# Supplementary material for: Antimicrobial resistance and virulence profiles of Enterobacterales isolated from two-finger and three-finger sloths (Choloepus hoffmanni and Bradypus variegatus) of Costa Rica
Source: PeerJ journal article supplement (doi:10.7717/peerj.12911), 2022-03-11

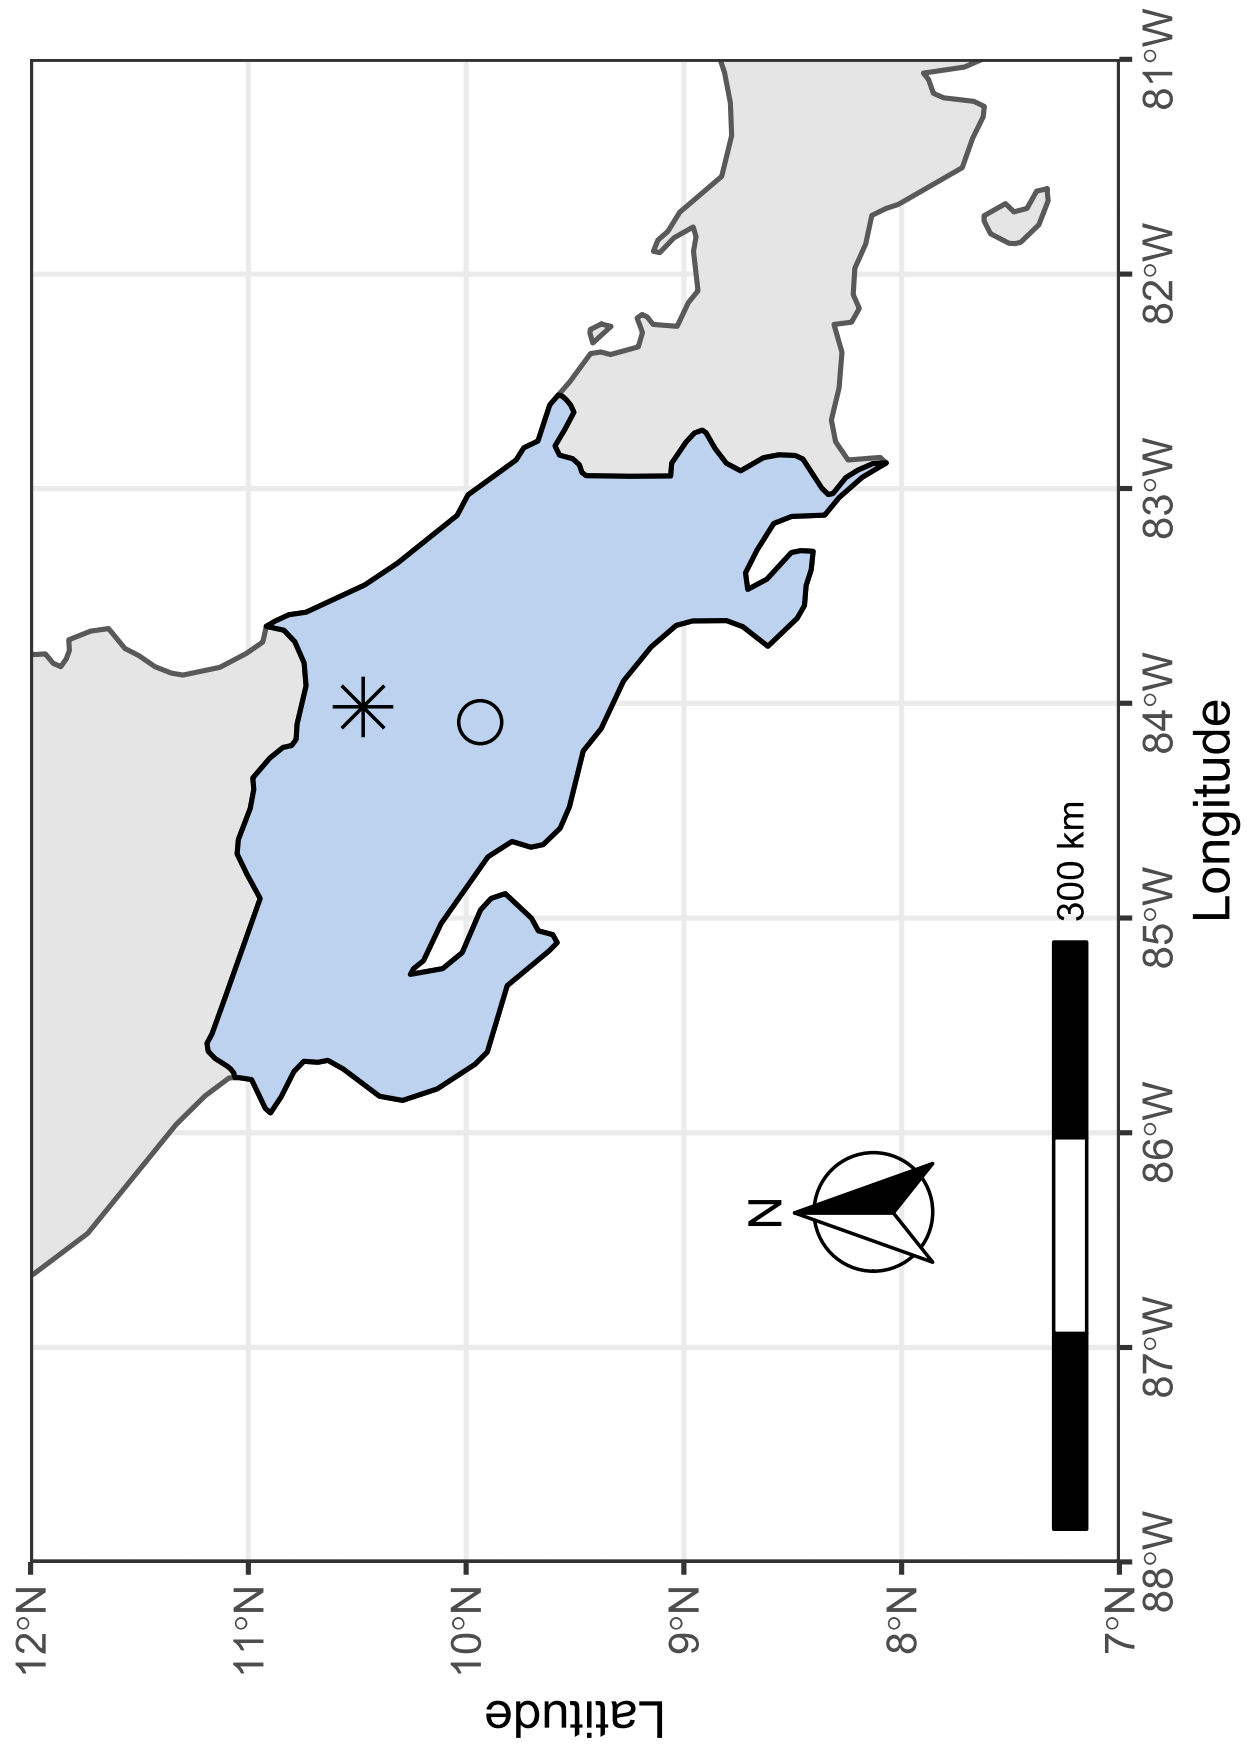

Supplement: Figure_S1.pdf [file Figure_S1.pdf]
