# Supplementary material for: Antimicrobial resistance and virulence profiles of Enterobacterales isolated from two-finger and three-finger sloths (Choloepus hoffmanni and Bradypus variegatus) of Costa Rica
Source: PeerJ. 2022 Mar 11;10:e12911. doi: 10.7717/peerj.12911 (PMC8919844; doi:10.7717/peerj.12911)
Supplement: Supplemental Information 1 — Number (n°.), rectal swab sample (R), oral swab sample (O), ampicillin (AMP), amikacin (AK), ciprofloxacin (CIP), enrofloxacin (ENR), imipenem (IMP), meropenem (MEM), cephalexin (CL), ceftazidime (CAZ), chloramphenicol (C), tetracycline (T), hemolysins (HEM), gelatinases (GEL), lecithinases (LEC), proteases (PT), lipases (LIP), biofilm (BF), beta-haemolysis (β), gamma-haemolysis (γ), multiple antibiotic resistance index (MAR index), virulence index (V. Index), positive (+), negative (-), multidrug-resistant isolates (*), extensively drug-resistant isolate (†). The animal number refers to Table S2 (“Animal data. Detailed data of the sloths under study”). [file peerj-10-12911-s001.xlsx]

## Sheet: Sheet1
Isolate nº.	Animal nº.	Isolate ID	Sample type	Resistance Profile		MAR Index	Virulence Profile							V. Index
				Intermediate	Resistant		HEM	DNase	GEL	LEC	PT	LIP	BF
1.01	19	E. coli*†	R	-	AMP, CIP, ENR, TET, CAP, MEM	0.5	γ	-	-	-	+	+	-	0.29
1.02	19	E. coli*	R	-	AMP, CIP, ENR, TET, CAP	0.42	γ	-	-	-	-	+	+	0.29
1.03	18	E. coli	R	-	MEM, AMK	0.17	β	-	-	-	+	+	-	0.43
1.04	18	E. coli	R	IMP	MEM, CFX	0.17	γ	+	-	-	+	+	-	0.43
1.05	18	E. coli	R	CFX	-	0.08	γ	-	-	-	-	+	+	0.29
1.06	15	E. coli	R	CFX	MEM	0.17	γ	-	-	-	+	+	-	0.29
1.07	15	E. coli	R	AMP, MEM, CAZ	ENR, TET	0.33	γ	-	-	-	-	+	+	0.29
1.08	13	E. coli	R	CFX	MEM	0.17	γ	-	-	-	-	+	-	0.14
1.09	13	E. coli	R	-	-	0	γ	-	-	-	-	+	+	0.29
1.1	9	E. coli	R	CFX	AMP, MEM	0.25	γ	+	-	-	+	+	+	0.57
1.11	8	E. coli	R	ENR	AMP, MEM	0.25	γ	-	-	-	-	+	-	0.14
1.12	8	E. coli	R	-	MEM, ENR	0.17	γ	+	-	-	+	+	-	0.43
1.13	8	E. coli	R	AMP	ENR	0.17	γ	-	-	-	-	+	+	0.29
1.14	32	E. coli	R	CFX	AMP, MEM	0.25	β	-	-	-	-	+	+	0.43
1.15	29	E. coli*	R		AMP, MEM, CFX	0.25	β	-	-	-	+	+	+	0.57
1.16	24	E. coli*	O		AMP, MEM, CFX, TET	0.33	β	+	+	+	+	+	+	1
1.17	23	E. coli	R	CFX	MEM	0.17	β	-	-	-	+	+	+	0.57
1.18	23	E. coli	R	CFX	MEM	0.17	β	+	-	-	+	+	+	0.71
1.19	23	E. coli	R	-	-	0	β	-	-	-	-	+	+	0.43
1.2	38	E. coli	R	CAP	AMP, CFX	0.25	γ	+	-	-	+	+	+	0.57
1.21	38	E. coli	R	MEM	CFX	0.17	γ	+	-	-	+	+	+	0.57
1.22	39	E. coli	R	TET	AMP	0.17	γ	-	-	-	-	+	+	0.29
2.01	22	C. youngae	R	MEM, CFX	AMP	0.25	β	-	-	-	+	+	-	0.43
2.02	28	C. youngae	R	AMP, AMC	MEM, CFX	0.33	β	-	-	-	-	+	-	0.29
2.03	28	C. youngae*	O	-	AMP, AMC, MEM, CFX, CAZ	0.42	β	-	-	-	-	+	-	0.29
2.04	34	C. youngae	O	-	MEM	0.08	β	-	-	-	+	+	-	0.43
2.05	34	C. youngae	O	-	MEM	0.08	β	+	-	-	+	+	+	0.72
2.06	37	C. youngae	R	-	MEM	0.08	β	-	-	-	+	+	+	0.43
2.07	37	C. youngae*	O	AMP, MEM, CFX	AMC, ENR, CAP	0.5	β	+	-	-	-	+	+	0.57
2.08	37	C. youngae*	R	CAZ	AMP, AMC, MEM, CFX	0.42	β	+	-	-	-	+	+	0.57
2.09	4	C. youngae	O	-	-	0	γ	+	-	-	-	+	+	0.43
3.01	5	E. amnigenus	O	CFX	CAZ	0.17	β	-	-	-	+	+	+	0.57
3.02	33	E. amnigenus	O	-	CFX	0.08	γ	+	-	-	-	+	+	0.43
3.03	7	E. amnigenus	O	-	CFX	0.08	β	-	-	-	+	+	-	0.43
4.01	8	E. cloacae	O	-	-	0.08	β	-	-	-	+	+	-	0.43
4.02	24	E. cloacae	O	-	AMP, MEM	0.17	β	-	-	-	-	+	-	0.29
5.01	20	E. aerogenes	R	-	AMP	0.08	β	-	-	-	+	+	+	0.57
6.01	26	Salmonella spp.	O	ENR, CAZ	MEM	0.25	β	-	-	-	-	+	-	0.29
6.02	21	Salmonella spp.	R	-	-	0	γ	+	-	-	-	+	-	0.29
7.01	19	Shigella sp.	O	-	AMP	0.08	β	-	-	-	-	+	+	0.43
