# Supplementary material for: Antimicrobial resistance and virulence profiles of Enterobacterales isolated from two-finger and three-finger sloths (Choloepus hoffmanni and Bradypus variegatus) of Costa Rica
Source: PeerJ. 2022 Mar 11;10:e12911. doi: 10.7717/peerj.12911 (PMC8919844; doi:10.7717/peerj.12911)
Supplement: Supplemental Information 2 — Choloepus hoffmanni (C. hoffmanni), Bradypus variegatus (B. variegatus). The details of the corresponding isolates are presented in Table S1 (“Isolates’ antimicrobial resistance and virulence profiles.”). *The age is approximated. [file peerj-10-12911-s002.xlsx]

## Sheet: Sheet1
Animal number	Location	Species	Status	Age*	Sex	Reason for admission	Previous diseases	Previous antibiotic treatment	Date of Sampling	Time of sampling	Time in rehabilitation	Corresponding Isolates
1	Headquarters	C. hoffmanni	Wild	2 years	Female	Electrocution	-	-	2019-05-11	at admission	-	-
2	Headquarters	C. hoffmanni	Wild	6 months	Female	Dog bite	-	-	2019-05-11	at admission	-	-
3	Headquarters	C. hoffmanni	Hand-reared	7 months	Male	Orphan	Endoparasites	Metronidazole	30/11/2019	2 months after admission	2 months	-
4	Headquarters	C. hoffmanni	Hand-reared	9 months	Male	Orphan	-	-	30/11/2019	2 months after admission	2 months	2.09
5	Headquarters	C. hoffmanni	Hand-reared	8 months	Female	Orphan	Endoparasites	Metronidazole	30/11/2019	2 months after admission	2 months	3.01
6	Headquarters	C. hoffmanni	Hand-reared	1 year	Male	Found on dead mother after electrocution	Endoparasites	Metronidazole	2019-07-11	2 months after admission	2 months	-
7	Headquarters	C. hoffmanni	Hand-reared	1 year	Female	Orphan	Endoparasites (coccidiosis)	Trimethoprim-sulfamethoxazole	2019-07-11	2 months after admission	2 months	3.03
8	Headquarters	C. hoffmanni	Hand-reared	2 years	Female	Orphan	-	-	2019-07-11	4 months after admission	4 months	1.11; 1.12; 1.13; 4.01
9	Headquarters	C. hoffmanni	Hand-reared	2 years	Female	Orphan	-	-	2019-07-11	4 months after admission	4 months	1.1
10	Headquarters	C. hoffmanni	Hand-reared	2 years	Female	Mother killed by a dog	Endoparasites (coccidiosis)	Trimethoprim-sulfamethoxazole	2019-01-12	1 year after admission	1 year	-
11	Headquarters	C. hoffmanni	Hand-reared	2 years	Male	Rescued from being kept as a pet	Endoparasites (coccidiosis)	Trimethoprim-sulfamethoxazole	2019-01-12	1 year after admission	1 year	-
12	Headquarters	C. hoffmanni	Hand-reared	2 years	Female	Orphan	Endoparasites (coccidiosis)	Trimethoprim-sulfamethoxazole	2020-02-03	1 year after admission	1 year	-
13	Headquarters	C. hoffmanni	Hand-reared	2 years	Female	Mother killed by a dog	Endoparasites (coccidiosis)	Trimethoprim-sulfamethoxazole	2020-02-03	1 year after admission	1 year	1.08; 1.09
14	Headquarters	C. hoffmanni	Hand-reared	2 years	Female	Orphan	Endoparasites (coccidiosis)	Trimethoprim-sulfamethoxazole	2019-02-12	1 year after admission	1 year	-
15	Headquarters	C. hoffmanni	Hand-reared	2 years	Female	Mother killed by a dog	Endoparasites (coccidiosis)	Trimethoprim-sulfamethoxazole	2019-02-12	1 year after admission	1 year	1.06; 1.07
16	Headquarters	B. variegatus	Hand-reared	3 months	Female	Mother killed by a car	-	-	24/12/2019	1 month after admission	1 month	-
17	Headquarters	C. hoffmanni	Wild	4 months	Male	Mother killed by a dog	-	-	24/12/2019	at admission	-	-
18	Headquarters	C. hoffmanni	Hand-reared	6 months	Male	Mother killed by a dog	-	-	24/12/2019	3 months after admission	3 months	1.03; 1.04; 1.05
19	Headquarters	C. hoffmanni	Hand-reared	5 months	Female	Orphan	Pneumonia, sloth bite	Enrofloxacin	24/12/2019	3 months after admission	3 months	1.01; 1.02; 7.01
20	Headquarters	C. hoffmanni	Wild	3+ years	Male	Electrocution	Electrocution	-	2020-08-03	at admission	-	5.01
21	Headquarters	C. hoffmanni	Wild	5 months	Male	Orphan	-	-	2020-08-03	at adimission	-	6.02
22	Release Site	C. hoffmanni	Rehabilitated and released	4 years	Male	Orphan	Fight wounds; endoparasites (coccidiosis)	Enrofloxacin, metronidazole, trimethoprim -sulfamethoxazole	17/12/2019	1 year from release	2 years	2.01
23	Release Site	C. hoffmanni	Rehabilitated and released	5 years	Female	Orphan	Fight wounds	Enrofloxacin	18/12/2019	2 years from release	3 years	1.17; 1.18; 1.19
24	Release Site	C. hoffmanni	Rehabilitated and released	2 years	Female	Orphan	Abscess (neck)	Amoxicillin-clavulanate	18/12/2019	2 months from release	2 years	1.16; 4.02
25	Release Site	C. hoffmanni	Rehabilitated and released	5 years	Female	Orphan	Endoparasites (intestinal nematodes)	Albendazole, trimethoprim -sulfamethoxazole	18/12/2019	2 years from release	1 year	-
26	Release Site	B. variegatus	Rehabilitated and released	1 year	Female	Orphan	Mycotic infection	-	17/12/2019	3 months from release	1 year	6.01
27	Release Site	C. hoffmanni	Rehabilitated and released	2 years	Male	Orphan	Endoparasites, hepatitis	Enrofloxacin, amikacin	20/12/2019	2 months from release	2 years	-
28	Release Site	C. hoffmanni	Rehabilitated and released	4 years	Male	Orphan	-	-	20/12/2019	1 year from release	3 years	2.02; 2.03
29	Release Site	C. hoffmanni	Rehabilitated and released	2 years	Male	Orphan	-	Enrofloxacin, amikacin	19/12/2019	2 months from release	1 year	1.15
30	Release Site	C. hoffmanni	Rehabilitated and released	2 years	Male	Orphan	-	-	20/12/2019	1 year from release	1 year	-
31	Release Site	C. hoffmanni	Wild	3 years	Female	Electrocution	Electrocution	-	23/1/2020	at admission	-	-
32	Release Site	B. variegatus	Rehabilitated and released	2 years	Female	Orphan	-	-	24/1/2020	6 months from release	1 year	1.14
33	Release Site	C. hoffmanni	Rehabilitated and released	2 years	Male	Orphan	Hepatitis, anaemia	Enrofloxacin, amikacin	19/12/2019	1 year from release	2 years	3.02
34	Release Site	C. hoffmanni	Rehabilitated and released	2 years	Male	Fell from tree	-	-	19/12/2019	1 year from release	2 years	2.04; 2.05
35	Release Site	C. hoffmanni	Rehabilitated and released	2 years	Male	Orphan	Hepatitis, anaemia	Enrofloxacin, amikacin	19/12/2019	1 year from release	2 years	-
36	Release Site	C. hoffmanni	Rehabilitated and released	2 years	Male	Orphan	Hepatitis, anaemia	Enrofloxacin, amikacin	19/12/2019	1 year from release	2 years	-
37	Release Site	C. hoffmanni	Rehabilitated and released	2 years	Male	Mother killed by a dog	Hepatitis, anaemia	Enrofloxacin, amikacin	18/12/2019	1 year from release	2 years	2.06; 2.07; 2.08
38	Release Site	C. hoffmanni	Rehabilitated and released	2 years	Female	Orphan	Hepatitis, anaemia	Enrofloxacin, amikacin	25/1/2020	1 year from release	3 years	1.20; 1.21
39	Release Site	B. variegatus	Rehabilitated and released	3+ years	Male	Dog attack	Dog bite wounds	Enrofloxacin	24/1/2020	1 year from release	1,5 years	1.22
